# Supplementary material
Source: Research Square preprint supplement (doi:10.21203/rs.3.rs-9359118/v1)
Supplement: Supplementary file 1 [file 34f8735d6af59740e1468f2e.docx]

**SUPPLEMENTARY MATERIAL**

***Table S1:*** *ICP-MS operating conditions.*

| ***Instrument parameters*** | ***Settings*** | |
| --- | --- | --- |
| RF Power (W) | | 1550 |
| Sampling Depth (mm) | | 9.0 |
| Plasma flow rate (L min-1) | | 15.0 |
| Carrier Gas (L min-1) | | Ar: 1.10 |
| Dilution Gas (L min-1) | | Ar: 0.10 |
| Tune mode | | Helium mode - high-energy helium mode (Se only) |
| He flow (ml min-1) | | 5.0 (10.0) |
| Peltier-cooler multipass condenser | | 2°C |
| Oxide/Doubly Charged Ratio | | 140Ce16O+/140Ce+: 0.339% |
|  | | 140Ce2+/140Ce: 1.416% |
| Internal standards | | 6Li, 45Sc, 89Y, 115In, 159Tb |
| Selected isotopes | | 7Li, 51V, 52Cr, 59Co, 60Ni, 63Cu, 66Zn, 75As, 78Se, 85Rb, 95Mo, 111Cd, 121Sb, 137Ba, 201Hg, 208Pb. |

***Table. S2:*** *ICP-OES operating conditions.*

| **Instrument parameters** | | **Setting** |
| --- | --- | --- |
| Read time (s) | | 5 |
| Replicates | | 3 |
| AVS | | Yes (loop volume 1.5 mL) |
| Pump rate – uptake (mL/min) | | 32.7 |
| Pump rate – Inject (mL/min) | | 2.2 |
| Valve uptake delay (s) | | 11.3 |
| Viewing modes | | axial, radial(*) |
| Stabilisation time (s) | | 15 (axial) – 40 (radial) |
| RF power (W) | | 1500 |
| Aux flow rate (L min-1) | | 1.00 |
| Plasma flow rate (L min-1) | | 12.0 |
| Nebulizer flow rate (L min-1) | | 0.70 |
| Elements (nm) | | P (213.618) - Al (237.312) - Fe (238.204) - Mn (257.610) - Ca (393.366)* - Mg (280.270) - Na (589.592) - Sr (421.552) - K (766.491)* |
| Viewing height (mm) | | 8 |
| Background correction | | fitted |
|  | |  |
|  |  | | |
|  |  | | |

***Table S3:*** *Analytical validation parameters for element determination, including method detection limits (MDLs), recommended/certified values of fish tissue (IAEA-407) and lake sediment (BCR-280R) reference materials, recovery (%), and relative standard deviation (RSD).*

| **ICP-MS** | **MDL**  **(mg kg-1)** | **Recommended values –**  **Fish Tissues**  **(mg kg-1)** | **Recovery**  **(%)** | **Certified values –**  **Lake sediment**  **(mg kg-1)** | **Recovery**  **(%)** |
| --- | --- | --- | --- | --- | --- |
| 7Li | 0.025 |  |  |  |  |
| 51V | 0.0032 | 1.43 ± 0.20 | 101 ± 2.8 |  |  |
| 52Cr | 0.011 | 0.73 ± 0.22 | 96 ± 2.4 | 126 ± 7 | 95 ± 3.3 |
| 59Co | 0.007 | 0.10 ± 0.02 | 95 ± 0.9 | 16.8 ± 0.9 | 98 ± 4.6 |
| 60Ni | 0.021 | 0.60 ± 0.18 | 87 ± 1.0 | 69 ± 5 | 89 ± 2.7 |
| 63Cu | 0.015 | 3.28 ± 0.40 | 90 ± 1.1 | 53 ± 6 | 91 ± 6.1 |
| 66Zn | 0.032 | 67.1 ± 3.8 | 103 ± 5.2 | 224 ± 25 | 100 ± 2.7 |
| 75As | 0.0069 | 12.6 ± 1.2 | 98 ± 2.1 | 33.4 ± 2.9 | 96 ± 5.1 |
| 78Se | 0.006 | 2.83 ± 0.38 | 93 ± 4.6 |  |  |
| 85Rb | 0.0036 | 2.86 ± 0.40 | 90 ± 5.4 |  |  |
| 95Mo | 0.006 |  |  |  |  |
| 111Cd | 0.007 | 0.189 ± 0.019 | 100 ± 0.8 | 0.85 ± 0.10 | 99 ± 3.9 |
| 137Ba | 3.0 |  |  |  |  |
| 121Sb | 0.006 |  |  |  |  |
| 201Hg | 0.025 | 0.222 ± 0.024 | 90 ± 5.6 | 1.46 ± 0.20 | 93 ± 5.4 |
| 208Pb | 0.008 | 0.12 ± 0.06 | 97 ± 2.6 |  |  |
| **ICP-OES** | **MDL**  **(mg kg-1)** | **Recommended values**  **(mg kg-1)** | **Recovery**  **(%)** |  |  |
| P (213.618) | 1.26 |  |  |  |  |
| Al (237.312) | 0.25 | 13.8 ± 3.7 | 91 ± 5.6 |  |  |
| Fe (238.204) | 0.011 | 146 ± 14 | 97 ± 2.2 |  |  |
| Mn (257.610) | 0.010 | 3.52 ± 0.32 | 98 ± 1.3 |  |  |
| Ca (393.366)* | 0.09 | 27000 ± 1800 | 90 ± 4.7 |  |  |
| Mg (280.270) | 0.137 | 2720 ± 140 | 97 2.2 |  |  |
| Na (589.592) | 0.639 | 13100 ± 600 |  |  |  |
| Sr (421.552) | 0.019 | 130 ± 11 | 93 1.3 |  |  |
| K (766.491)* | 2.94 | 13100 ± 1200 | 91 5.6 |  |  |

***Table S4:*** *Metal concentration (mg•kg⁻¹) in sediments collected at the three sampling sites. Data is showed as Mean and SD.*

| **Metals** | **Gozzano** | | **Orta** | | **Baveno** | |
| --- | --- | --- | --- | --- | --- | --- |
| **Metals** | **Media** | **SD** | **Media** | **SD** | **Media** | **SD** |
| Al | 6983.39 | 1988.73 | 5972.58 | 391.11 | 10696.84 | 300.13 |
| As | 2.06 | 0.29 | 2.18 | 0.06 | 7.46 | 1.10 |
| Ba | 28.85 | 9.96 | 32.72 | 2.02 | 40.28 | 1.35 |
| Ca | 1430.93 | 386.72 | 1249.57 | 49.98 | 1734.65 | 156.88 |
| Cd | 0.66 | 0.08 | 0.66 | 0.02 | 0.73 | 0.03 |
| Co | 5.88 | 1.37 | 5.61 | 0.24 | 9.19 | 0.52 |
| Cr | 21.89 | 9.46 | 18.01 | 2.04 | 18.58 | 0.67 |
| Cu | 60.65 | 50.03 | 34.43 | 5.67 | 20.17 | 5.05 |
| Fe | 10595.18 | 3012.72 | 8719.96 | 669.61 | 16580.06 | 412.89 |
| Hg | 0.02 | 0.00 | 0.02 | 0.00 | 0.32 | 0.33 |
| K | 687.40 | 322.28 | 606.21 | 68.36 | 1907.04 | 64.00 |
| Li | 12.59 | 3.44 | 8.84 | 0.98 | 21.21 | 0.93 |
| Mg | 3370.86 | 856.16 | 2767.98 | 190.73 | 5189.17 | 124.46 |
| Mn | 113.20 | 31.40 | 89.23 | 5.55 | 158.72 | 3.17 |
| Mo | 1.30 | 0.08 | 1.32 | 0.03 | 1.44 | 0.03 |
| Na | 94.88 | 15.08 | 81.31 | 12.75 | 90.70 | 5.61 |
| Ni | 32.35 | 15.35 | 22.04 | 1.58 | 19.84 | 2.67 |
| P | 304.23 | 49.57 | 319.66 | 13.31 | 423.99 | 28.62 |
| Pb | 21.91 | 10.74 | 21.08 | 4.11 | 14.66 | 2.01 |
| Rb | 10.93 | 4.53 | 11.18 | 1.21 | 20.18 | 0.65 |
| Sb | 2.89 | 0.55 | 3.13 | 0.37 | 3.62 | 0.71 |
| Se | 0.40 | 0.12 | 0.41 | 0.18 | 0.82 | 0.07 |
| Sr | 5.51 | 1.71 | 5.21 | 0.25 | 11.06 | 0.82 |
| V | 17.00 | 4.43 | 13.54 | 1.02 | 21.34 | 0.24 |
| Zn | 99.31 | 58.74 | 62.58 | 9.23 | 64.21 | 12.86 |

***Table S5:*** *Metal concentration (mg•kg⁻¹) in soft tissues collected at the three sampling sites. Data is showed as Mean and SD.*

| **Metals** | **Gozzano** | | **Orta** | | **Baveno** | |
| --- | --- | --- | --- | --- | --- | --- |
| **Metals** | **Media** | **SD** | **Media** | **SD** | **Media** | **SD** |
| Al | 405.61 | 134.54 | 548.61 | 197.69 | 626.66 | 248.26 |
| As | 7.27 | 0.56 | 8.19 | 3.21 | 16.55 | 2.88 |
| Ca | 6632.86 | 3630.04 | 9048.40 | 1614.71 | 9986.17 | 2708.48 |
| Cd | 7.67 | 3.72 | 10.39 | 1.72 | 10.58 | 3.27 |
| Co | 1.15 | 0.34 | 1.72 | 0.60 | 1.95 | 0.56 |
| Cr | 15.54 | 6.16 | 12.90 | 4.02 | 3.99 | 1.10 |
| Cu | 113.38 | 32.80 | 154.83 | 90.58 | 8.28 | 1.33 |
| Fe | 3042.81 | 906.11 | 4036.61 | 1281.59 | 5307.22 | 1320.34 |
| Hg | 0.14 | 0.05 | 0.12 | 0.03 | 0.12 | 0.05 |
| K | 2287.16 | 286.92 | 2240.64 | 365.83 | 2458.84 | 318.45 |
| Li | 0.48 | 0.15 | 0.57 | 0.14 | 0.74 | 0.28 |
| Mg | 1573.46 | 283.74 | 1858.75 | 185.96 | 1713.10 | 376.67 |
| Mn | 2896.11 | 1705.72 | 5075.52 | 1463.51 | 8359.85 | 2810.16 |
| Mo | 0.50 | 0.13 | 0.53 | 0.10 | 0.54 | 0.10 |
| Na | 3893.41 | 984.48 | 4100.02 | 1026.25 | 5170.81 | 770.79 |
| Ni | 4.83 | 0.83 | 5.85 | 0.98 | 2.81 | 0.54 |
| Pb | 55.49 | 30.47 | 57.60 | 20.17 | 7.03 | 3.31 |
| Rb | 4.80 | 1.51 | 5.80 | 0.84 | 6.13 | 0.96 |
| Sb | 0.05 | 0.02 | 0.05 | 0.01 | 0.07 | 0.04 |
| Se | 2.93 | 0.50 | 2.74 | 0.51 | 2.96 | 0.21 |
| Sr | 132.45 | 59.13 | 302.26 | 86.40 | 554.15 | 189.53 |
| V | 0.80 | 0.23 | 0.94 | 0.30 | 1.20 | 0.37 |
| Zn | 425.90 | 188.07 | 488.62 | 93.27 | 436.88 | 145.59 |

***Table S6:*** *Metal concentration (mg•kg⁻¹) in shells collected at the three sampling sites. Data is showed as Mean and SD.*

| **Metals** | **Gozzano** | | **Orta** | | **Baveno** | |
| --- | --- | --- | --- | --- | --- | --- |
| **Metals** | **Media** | **SD** | **Media** | **SD** | **Media** | **SD** |
| Al | 20.81 | 19.79 | 18.59 | 8.95 | 28.21 | 12.17 |
| As | 0.16 | 0.07 | 0.46 | 0.18 | 2.94 | 1.45 |
| Ba | 59.75 | 9.72 | 38.32 | 4.00 | 42.18 | 7.63 |
| Ca | 388022.38 | 30923.33 | 361311.64 | 6870.45 | 345011.98 | 95973.50 |
| Cd | 0.06 | 0.07 | 0.06 | 0.03 | 0.03 | 0.02 |
| Co | 0.06 | 0.03 | 0.08 | 0.03 | 0.09 | 0.03 |
| Cr | 1.12 | 0.17 | 1.00 | 0.11 | 0.74 | 0.06 |
| Cu | 31.04 | 47.29 | 9.60 | 4.79 | 15.90 | 10.84 |
| Fe | 62.06 | 36.72 | 170.30 | 72.90 | 313.99 | 121.54 |
| Hg | 0.47 | 0.13 | 0.21 | 0.05 | 0.11 | 0.02 |
| K | 49.17 | 7.70 | 76.80 | 30.64 | 59.60 | 24.86 |
| Li | 0.34 | 0.11 | 0.24 | 0.13 | 0.19 | 0.13 |
| Mg | 23.99 | 12.53 | 32.79 | 11.68 | 30.23 | 11.56 |
| Mn | 161.50 | 46.46 | 215.82 | 58.94 | 260.77 | 62.71 |
| Mo | 0.04 | 0.01 | 0.04 | 0.01 | 0.07 | 0.05 |
| Na | 1947.98 | 149.43 | 1657.90 | 57.07 | 1807.12 | 153.46 |
| Ni | 1.10 | 0.91 | 2.37 | 0.61 | 0.28 | 0.15 |
| P | 89.18 | 17.96 | 104.37 | 13.22 | 108.24 | 17.70 |
| Pb | 1.74 | 2.00 | 1.54 | 0.41 | 0.97 | 0.68 |
| Rb | 0.16 | 0.09 | 0.04 | 0.04 | 0.03 | 0.03 |
| Sb | 0.16 | 0.13 | 0.31 | 0.35 | 1.43 | 3.53 |
| Se | 0.16 | 0.13 | 0.15 | 0.10 | 0.14 | 0.07 |
| Sr | 392.62 | 37.00 | 625.76 | 81.67 | 909.80 | 150.58 |
| V | 0.10 | 0.07 | 0.11 | 0.04 | 0.16 | 0.06 |
| Zn | 22.99 | 34.80 | 7.98 | 5.67 | 9.65 | 8.34 |

***Table S7:*** *P-values obtained from the statistical analysis of metal concentrations in sediment, soft tissue and shell, between the three sampling sites; one-way ANOVA or non-parametric Kruskal-Wallis test were employed. Significant p-values are highlighted (* = p < 0.05; ** = p < 0.01; *** = p < 0.001; **** = p < 0.0001; ns = not significant; nm = not measured; bdl = below detection limit).*

| **Metal** | **Sediment** | **Sign.** | **Tissue** | **Sign.** | **Shell** | **Sign.** |
| --- | --- | --- | --- | --- | --- | --- |
| Al | 0.0001 | **** | 0.1823 | NS | 0.268 | NS |
| As | 0.0001 | **** | 0.0001 | **** | 0.0001 | **** |
| Ba | 0.0287 | * | - | NM | 0.0001 | **** |
| Ca | 0.0312 | * | 0.2643 | NS | 0.2427 | NS |
| Cd | 0.1068 | NS | 0.1414 | NS | 0.2021 | NS |
| Co | 0.0001 | **** | 0.0130 | * | 0.1208 | NS |
| Cr | 0.5894 | NS | 0.0001 | **** | 0.0001 | **** |
| Cu | 0.0536 | NS | 0.0001 | **** | 0.3917 | NS |
| Fe | 0.0006 | *** | 0.0117 | * | 0.0001 | **** |
| Hg | - | BDL | 0.6179 | NS | 0.0001 | **** |
| K | 0.0001 | **** | 0.3397 | NS | 0.1169 | NS |
| Li | 0.0001 | **** | 0.0862 | NS | 0.0882 | NS |
| Mg | 0.0004 | *** | 0.1175 | NS | 0.5072 | NS |
| Mn | 0.0002 | *** | 0.0005 | *** | 0.0085 | ** |
| Mo | 0.0029 | ** | 0.6684 | NS | 0.0052 | ** |
| Na | 0.2214 | NS | 0.0155 | * | 0.0017 | ** |
| Ni | 0.0886 | NS | 0.0001 | **** | 0.0003 | *** |
| P | 0.0002 | *** | - | NM | 0.0873 | NS |
| Pb | 0.0364 | * | 0.0002 | *** | 0.0406 | * |
| Rb | 0.0005 | *** | 0.0664 | NS | 0.0003 | *** |
| Sb | 0.1646 | NS | 0.2154 | NS | 0.1931 | NS |
| Se | 0.0008 | *** | 0.4225 | NS | 0.7794 | NS |
| Sr | 0.0001 | **** | 0.0001 | **** | 0.0001 | **** |
| V | 0.0019 | ** | 0.0736 | NS | 0.0715 | NS |
| Zn | 0.2309 | NS | 0.608 | NS | 0.3785 | NS |

***Table S8:*** *Results of one-way ANOVA or Kruskal–Wallis tests testing differences in metal concentrations in sediment among sites. For metals showing a significant global effect (p < 0.05), Tukey HSD or Dunn post hoc tests were applied. Significant pairwise comparisons are reported as site pairs. Site abbreviations: B = Baveno; G = Gozzano; O = Orta.*

| **Metal** | **Test** | **Statistic** | **p (global)** | **Post hoc test** | **Sig. comp.** | **Post hoc p** |
| --- | --- | --- | --- | --- | --- | --- |
| Al | ANOVA | F = 22.11 | <0.0001 | Tukey | G-B; O-B | 0.0009; 0.0001 |
| As | ANOVA | F = 109.4 | <0.0001 | Tukey | G-B; O-B | <0.0001; <0.0001 |
| Ba | ANOVA | F = 4.845 | 0.0287 | Tukey | G-B | 0.0249 |
| Ca | KW | H = 6.5 | 0.0312 | Dunn | O-B | 0.04 |
| Cd | ANOVA | F = 2.711 | 0.1068 | - | - | - |
| Co | ANOVA | F = 22.29 | <0.0001 | Tukey | G-B; O-B | 0.0003; 0.0002 |
| Cr | ANOVA | F = 0.5526 | 0.5894 | - | - | - |
| Cu | ANOVA | F = 3.771 | 0.0536 | - | - | - |
| Fe | KW | H = 10.22 | 0.0006 | Dunn | O-B | 0.0056 |
| Hg | - | - | - | - | - | - |
| K | ANOVA | F = 70.72 | <0.0001 | Tukey | G-B; O-B | <0.0001; <0.0001 |
| Li | ANOVA | F = 44.28 | <0.0001 | Tukey | G-B; O-B | <0.0001; <0.0001 |
| Mg | KW | H = 10.5 | 0.0004 | Dunn | O-B | 0.0044 |
| Mn | ANOVA | F = 18.2 | 0.0002 | Tukey | G-B; O-B | 0.0056; 0.0002 |
| Mo | KW | H = 9.380 | 0.0029 | Dunn | G-B; O-B | 0.0216; 0.0267 |
| Na | ANOVA | F = 1.714 | 0.2214 | - | - | - |
| Ni | KW | H = 4.820 | 0.0886 | - | - | - |
| P | ANOVA | F = 18.44 | 0.0002 | Tukey | G-B; O-B | 0.0003; 0.0010 |
| Pb | KW | H = 6.18 | 0.0364 | Dunn | - | - |
| Rb | ANOVA | F = 15.24 | 0.0005 | Tukey | G-B; O-B | 0.0009; 0.0016 |
| Sb | KW | H = 3.660 | 0.1646 | - | - | - |
| Se | ANOVA | F = 13.62 | 0.0008 | Tukey | G-B; O-B | 0.0018; 0.0020 |
| Sr | ANOVA | F = 34.33 | <0.0001 | Tukey | G-B; O-B | <0.0001; <0.0001 |
| V | ANOVA | F = 11.01 | 0.0019 | Tukey | O-B | 0.0014 |
| Zn | ANOVA | F = 1.66 | 0.2309 | - | - | - |

***Table S9:*** *Loadings of sediment metal concentrations on the first two principal components.*

| **Var** | **PC1** | **PC2** |
| --- | --- | --- |
| Al | 0.992 | 0.010 |
| As | 0.885 | -0.415 |
| Ba | 0.869 | 0.226 |
| Ca | 0.917 | 0.309 |
| Cd | 0.843 | 0.233 |
| Co | 0.992 | -0.078 |
| Cr | 0.376 | 0.914 |
| Cu | 0.062 | 0.980 |
| Fe | 0.988 | -0.013 |
| Hg | 0.601 | -0.259 |
| K | 0.961 | -0.224 |
| Li | 0.965 | -0.071 |
| Mg | 0.984 | -0.031 |
| Mn | 0.972 | 0.096 |
| Mo | 0.932 | -0.006 |
| Ni | 0.130 | 0.970 |
| P | 0.923 | -0.150 |
| Pb | -0.068 | 0.881 |
| Rb | 0.981 | -0.032 |
| Sb | 0.439 | -0.347 |
| Se | 0.798 | -0.356 |
| Sr | 0.971 | -0.202 |
| V | 0.943 | 0.240 |
| Zn | 0.272 | 0.949 |
| Eigenvalues | 15.8 | 5.3 |
| Proportion of variance (%) | 65.63% | 22.06% |
| Cumulative proportion (%) | 65.63% | 87.70% |

***Table S10:*** *Results of one-way ANOVA or Kruskal–Wallis tests testing differences in metal concentrations in soft tissues among sites. For metals showing a significant global effect (p < 0.05), Tukey HSD or Dunn post hoc tests were applied. Only significant pairwise comparisons are reported. Site abbreviations: B = Baveno; G = Gozzano; O = Orta.*

| **Metal** | **Test** | **Statistic** | **p (global)** | **Post hoc test** | **Sig. comp.** | **Post hoc p** |
| --- | --- | --- | --- | --- | --- | --- |
| Al | ANOVA | F = 1.848 | 0.1823 | - | - | - |
| As | ANOVA | F = 31.47 | <0.0001 | Tukey | G-B; O-B | <0.0001; <0.0001 |
| Ba | - | - | - | - | - | - |
| Ca | KW | H = 2.662 | 0.2643 | - | - | - |
| Cd | ANOVA | F = 2.151 | 0.1414 | - | - | - |
| Co | ANOVA | F = 5.378 | 0.0130 | Tukey | G-B | 0.0097 |
| Cr | ANOVA | F = 35.89 | <0.0001 | Tukey | G-B; O-B | <0.0001; <0.0001 |
| Cu | ANOVA | F = 103.8 | <0.0001 | Tukey | G-B; O-B | <0.0001; <0.0001 |
| Fe | KW | H = 8.889 | 0.0117 | Dunn | G-B | 0.0122 |
| Hg | ANOVA | F = 0.492 | 0.6179 | - | - | - |
| K | ANOVA | F = 1.137 | 0.3397 | - | - | - |
| Li | ANOVA | F = 2.76 | 0.0862 | - | - | - |
| Mg | KW | H = 4.282 | 0.1175 | - | - | - |
| Mn | ANOVA | F = 11.25 | 0.0005 | Tukey | G-B; O-B | 0.0006; 0.018 |
| Mo | KW | H = 0.805 | 0.6684 | - | - | - |
| Na | ANOVA | F = 5.118 | 0.0155 | Tukey | G-B; O-B | 0.0352; 0.0498 |
| Ni | KW | H = 17.90 | 0.0001 | Dunn | G-B; O-B | 0.0219; 0.0002 |
| P | - | - | - | - | - | - |
| Pb | KW | H = 17.28 | 0.0002 | Dunn | G-B; O-B | 0.0047; 0.001 |
| Rb | ANOVA | F = 3.094 | 0.0664 | - | - | - |
| Sb | KW | H = 3.071 | 0.2154 | - | - | - |
| Se | ANOVA | F = 0.897 | 0.4225 | - | - | - |
| Sr | ANOVA | F = 16.39 | <0.0001 | Tukey | G-B; O-B | <0.0001; 0.0046 |
| V | ANOVA | F = 2.962 | 0.0736 | - | - | - |
| Zn | ANOVA | F = 0.509 | 0.608 | - | - | - |

***Table S11:*** *Loadings of soft tissues metal concentrations on the first two principal components.*

| **Var** | **PC1** | **PC2** |
| --- | --- | --- |
| As | -0.917 | -0.026 |
| Co | -0.620 | 0.745 |
| Cr | 0.755 | 0.354 |
| Cu | 0.750 | 0.527 |
| Fe | -0.773 | 0.508 |
| Na | -0.585 | 0.387 |
| Ni | 0.737 | 0.548 |
| Mn | -0.853 | 0.285 |
| Pb | 0.794 | 0.538 |
| Sr | -0.892 | 0.217 |
| Eigenvalues | 5.996 | 2.085 |
| Proportion of variance (%) | 59.96% | 20.85% |
| Cumulative proportion (%) | 59.96% | 80.81% |

***Table S12:*** *Bioconcentration factors, calculated for each metal as the ratio between sediment concentrations and those measured in each compartment.*

| **Metals** | **Tissue** | | | **Shell** | | |
| --- | --- | --- | --- | --- | --- | --- |
| **Gozzano** | **Orta** | **Baveno** | **Gozzano** | **Orta** | **Baveno** |
| Al | 0.058 | 0.092 | 0.059 | 0.003 | 0.003 | 0.003 |
| As | 3.527 | 3.759 | 2.218 | 0.075 | 0.213 | 0.394 |
| Ba | 2.071 | 1.171 | 1.047 | - | - | - |
| Ca | 4.635 | 7.241 | 5.757 | 271.169 | 289.148 | 198.894 |
| Cd | 11.543 | 15.755 | 14.489 | 0.088 | 0.084 | 0.043 |
| Co | 0.196 | 0.307 | 0.212 | 0.011 | 0.015 | 0.010 |
| Cr | 0.710 | 0.716 | 0.215 | 0.051 | 0.056 | 0.040 |
| Cu | 1.869 | 4.497 | 0.410 | 0.512 | 0.279 | 0.788 |
| Fe | 0.287 | 0.463 | 0.320 | 0.006 | 0.020 | 0.019 |
| K | 3.327 | 3.696 | 1.289 | 0.072 | 0.127 | 0.031 |
| Li | 0.038 | 0.065 | 0.035 | 0.027 | 0.027 | 0.009 |
| Mg | 0.467 | 0.672 | 0.330 | 0.007 | 0.012 | 0.006 |
| Mn | 25.585 | 56.884 | 52.671 | 1.427 | 2.419 | 1.643 |
| Mo | 0.388 | 0.405 | 0.374 | 0.032 | 0.032 | 0.049 |
| Na | 41.034 | 50.423 | 57.011 | 20.530 | 20.389 | 19.924 |
| Ni | 0.149 | 0.265 | 0.142 | 0.034 | 0.108 | 0.014 |
| P | 0.293 | 0.326 | 0.255 | - | - | - |
| Pb | 2.533 | 2.732 | 0.480 | 0.079 | 0.073 | 0.066 |
| Rb | 0.439 | 0.519 | 0.304 | 0.015 | 0.004 | 0.002 |
| Sb | 0.018 | 0.015 | 0.019 | 0.055 | 0.099 | 0.394 |
| Se | 7.418 | 6.732 | 3.594 | 0.406 | 0.365 | 0.173 |
| Sr | 24.049 | 58.012 | 50.099 | 71.289 | 120.101 | 82.253 |
| V | 0.047 | 0.069 | 0.056 | 0.006 | 0.008 | 0.008 |
| Zn | 4.288 | 7.807 | 6.804 | 0.231 | 0.127 | 0.150 |

***Table S13:*** *Results of one-way ANOVA or Kruskal–Wallis tests testing differences in metal concentrations in shells among sites. For metals showing a significant global effect (p < 0.05), Tukey HSD or Dunn post hoc tests were applied. Only significant pairwise comparisons are reported. Site abbreviations: B = Baveno; G = Gozzano; O = Orta.*

| **Metal** | **Test** | **Statistic** | **p (global)** | **Post hoc test** | **Sig. comp.** | **Post hoc p** |
| --- | --- | --- | --- | --- | --- | --- |
| Al | ANOVA | F = 1.395 | 0.268 | - | - | - |
| As | ANOVA | F = 21.75 | <0.0001 | Tukey | G-B; O-B | <0.0001; <0.0001 |
| Ba | ANOVA | F = 16.45 | <0.0001 | Tukey | G-O; G-B | <0.0001; 0.0002 |
| Ca | KW | H = 2.832 | 0.2427 | - | - | - |
| Cd | ANOVA | F = 1.715 | 0.2021 | - | - | - |
| Co | ANOVA | F = 2.320 | 0.1208 | - | - | - |
| Cr | ANOVA | F = 30.85 | <0.0001 | Tukey | G-B; O-B | <0.0001; <0.0001 |
| Cu | ANOVA | F = 0.976 | 0.3917 | - | - | - |
| Fe | KW | H = 17.7 | 0.0001 | Dunn | G-B | <0.0001 |
| Hg | ANOVA | F = 80.43 | <0.0001 | Tukey | G-O; G-B; O-B | <0.0001; <0.0001; <0.0001 |
| K | ANOVA | F = 2.36 | 0.1169 | - | - | - |
| Li | ANOVA | F = 2.704 | 0.0882 | - | - | - |
| Mg | KW | H = 1.358 | 0.5072 | - | - | - |
| Mn | ANOVA | F = 5.9 | 0.0085 | Tukey | G-B | 0.0067 |
| Mo | KW | H = 10.50 | 0.0052 | Dunn | G-B; O-B | 0.0366; 0.0140 |
| Na | ANOVA | F = 8.547 | 0.0017 | Tukey | G-O | 0.0012 |
| Ni | KW | H = 16.56 | 0.0003 | Dunn | O-B | 0.0001 |
| P | ANOVA | F = 2.717 | 0.0873 | - | - | - |
| Pb | KW | H = 6.406 | 0.0406 | Dunn | O-B | 0.0342 |
| Rb | ANOVA | F = 11.98 | 0.0003 | Tukey | G-O; G-B | 0.0020; 0.0003 |
| Sb | KW | H = 3.289 | 0.1931 | - | - | - |
| Se | ANOVA | F = 0.252 | 0.7794 | - | - | - |
| Sr | ANOVA | F = 43.23 | <0.0001 | Tukey | G-O; G-B; O-B | 0.0028; <0.0001; <0.0001 |
| V | ANOVA | F = 2.966 | 0.0715 | - | - | - |
| Zn | ANOVA | F = 1.014 | 0.3785 | - | - | - |

***Table S14:*** *Loadings of shell metal concentrations on the first two principal components.*

| **Var** | **PC1** | **PC2** |
| --- | --- | --- |
| As | 0.845 | 0.391 |
| Ba | -0.513 | 0.684 |
| Cr | -0.828 | 0.131 |
| Fe | 0.850 | 0.310 |
| Hg | -0.893 | 0.295 |
| Mn | 0.648 | 0.410 |
| Mo | 0.468 | 0.523 |
| Na | -0.221 | 0.615 |
| Ni | -0.447 | -0.298 |
| Pb | -0.417 | 0.480 |
| Rb | -0.706 | 0.488 |
| Sr | 0.884 | 0.185 |
| Eigenvalues | 5.523 | 2.233 |
| Proportion of variance (%) | 46.03% | 18.61% |
| Cumulative proportion (%) | 46.03% | 64.64% |

***Table S15:*** *Relative abundance of metals in sediments, soft tissues, and shells at the three sampling sites, expressed as decreasing order of mean concentrations.*

| **Compartment** | **Site** | **Sequences** |
| --- | --- | --- |
| **Sediment** | Gozzano | Fe>Al>Mg>Ca>K>P>Mn>Zn>Na>Cu>Ni>Ba>Pb>Cr>V>Li>  Rb>Co>Sr>Sb>As>Mo>Cd>Se>Hg |
| Orta | Fe>Al>Mg>Ca>K>P>Mn>Na>Zn>Cu>Ba>Ni>Pb>Cr>V>Rb>  Li>Co>Sr>Sb>As>Mo>Cd>Se>Hg |
| Baveno | Fe>Al>Mg>K>Ca>P>Mn>Na>Zn>Ba>V>Li>Rb>Cu>Ni>Cr>  Pb>Sr>Co>As>Sb>Mo>Se>Cd>Hg |
| **Soft tissues** | Gozzano | Ca>Na>Fe>Mn>K>Mg>Zn>Al>Sr>Cu>Pb>Cr>Cd>As>Ni>  Rb>Se>Co>V>Mo>Li>Hg>Sb |
| Orta | Ca>Mn>Na>Fe>K>Mg>Al>Zn>Sr>Cu>Pb>Cr>Cd>As>Ni>  Rb>Se>Co>V>Li>Mo>Hg>Sb |
| Baveno | Ca>Mn>Fe>Na>K>Mg>Al>Sr>Zn>As>Cd>Cu>Pb>Rb>Cr>  Se>Ni>Co>V>Li>Mo>Hg>Sb |
| **Shell** | Gozzano | Ca>Na>Sr>Mn>P>Fe>Ba>K>Cu>Mg>Zn>Al>Pb>Cr>Ni>  Hg>Li>Rb>Se>Sb>As>V>Co>Cd>Mo |
| Orta | Ca>Na>Sr>Mn>Fe>P>K>Ba>Mg>Al>Cu>Zn>Ni>Pb>Cr>  As>Sb>Li>Hg>Se>V>Co>Cd>Mo>Rb |
| Baveno | Ca>Na>Sr>Fe>Mn>P>K>Ba>Mg>Al>Cu>Zn>As>Sb>Pb>  Cr>Ni>Li>V>Se>Hg>Co>Mo>Rb>Cd |

***Table S16:*** *Daily accumulation rates of metals in shells and soft tissues, calculated as the difference between the mean concentrations in tissues and shells in organisms from the translocation site (Bagnera di Orta) and the donor site (Baveno), expressed in µg*kg-1/day.*

| **Metals** | **Shells** | **Soft tissues** |
| --- | --- | --- |
| As | -2.74 | -9.25 |
| Cd | 0.03 | -0.20 |
| Cr | 0.29 | 9.86 |
| Cu | -6.97 | 162.11 |
| Hg | 0.11 | 0.01 |
| Ni | 2.32 | 3.36 |
| Pb | 0.63 | 55.93 |
| Zn | -1.86 | 57.23 |
